# Supplementary material for: Unique Pd/graphene nanocomposites constructed using supercritical fluid for superior electrochemical sensing performance
Source: Royal Society of Chemistry journal article supplement (doi:10.1039/c2jm33671e), 2012-01-01
Supplement: c2jm33671e.pdf [file c2jm33671e.pdf]

# **Unique Pd/Graphene Nanocomposites Constructed Using Supercritical Fluid for Superior Electrochemical Sensing Performance**

Cheng-Hung Wu<sup>1</sup>, Chueh-Han Wang<sup>1</sup>, Ming-Tsung Lee<sup>1</sup>, Jeng-Kuei Chang<sup>1,2,3\*</sup>

<sup>1</sup> Institute of Materials Science and Engineering,

<sup>2</sup> Department of Chemical and Materials Engineering,

<sup>3</sup> Department of Mechanical Engineering,

National Central University, Taoyuan, Taiwan

E-mail: [jkchang@ncu.edu.tw](mailto:jkchang@ncu.edu.tw); Fax: +886-3-2805034

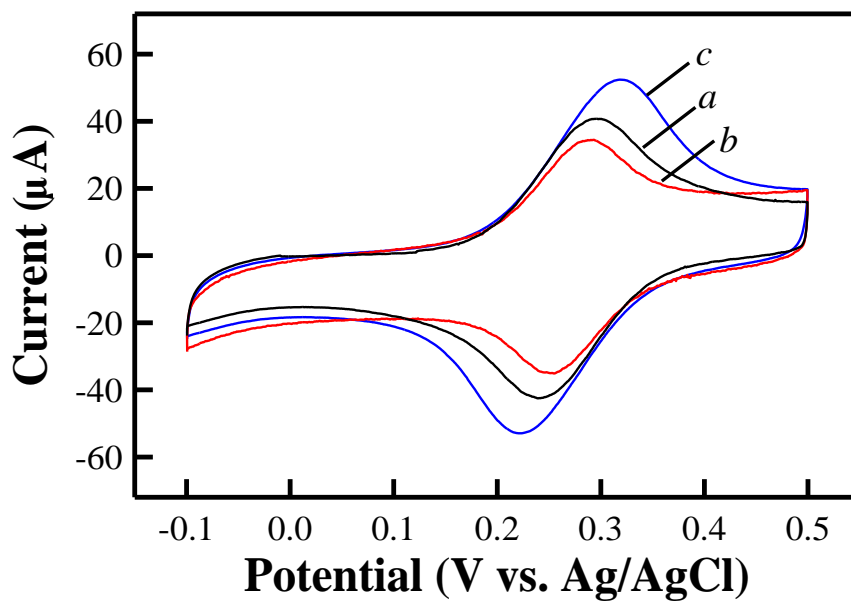

Fig. S11. Cyclic voltammograms of the graphene (curve *a*), Pd/graphene@air (curve *b*), and Pd/graphene@scCO<sub>2</sub> (curve *c*) electrodes recorded in solution containing 0.01 M Fe(CN)<sub>6</sub><sup>4-/3-</sup> and 1 M KCl at a potential scan rate of 50 mV/s.
